# Supplementary material for: Antiplatelet Therapy Combinations and Thrombogenicity in Patients with Non-Valvular Atrial Fibrillation
Source: PubMed Central journal article supplement — Korean Circ J. 2017 May 25;47(3):366–76. doi: 10.4070/kcj.2016.0384 (PMC5449531; doi:10.4070/kcj.2016.0384), 2017-05-25
Supplement: kcj-47-366-s001.pdf [file kcj-47-366-s001.pdf]

**Supplementary Table 1.** The levels of thrombogenic biomarkers in patients of CHA<sub>2</sub>DS<sub>2</sub>-VAsC score  $\geq 2$ 

| Variables            | CLPD group (n=12) | CILO group (n=8) | PUFA group (n=6) | p     |
|----------------------|-------------------|------------------|------------------|-------|
| vWF:Ag (IU/dL)       |                   |                  |                  |       |
| Aspirin monotherapy  | 164.3±34.3        | 153.0±34.8       | 137.6±15.2       | 0.396 |
| Combination therapy  | 151.9±37.0        | 144.8±33.4       | 129.7±26.0       | 0.487 |
| LS mean difference   | 12.4              | 8.2              | 7.9              |       |
| 95% CI of difference | -9.7 to 34.5      | -10.2 to 26.5    | -17.2 to 32.9    |       |
| p value              | 0.272             | 0.401            | 0.345            |       |
| Fibrinogen (mg/dL)   |                   |                  |                  |       |
| Aspirin monotherapy  | 319.3±56.8        | 316.3±103.6      | 315.5±55.2       | 0.217 |
| Combination therapy  | 291.1±62.3        | 313.4±66.5       | 291.5±47.8       | 0.334 |
| LS mean difference   | 28.2              | 2.9              | 24.0             |       |
| 95% CI of difference | -2.5 to 58.8      | -32.4 to 38.2    | -8.0 to 56.0     |       |
| p value              | 0.071             | 1.000            | 0.116            |       |
| D-dimer (ng/mL)      |                   |                  |                  |       |
| Aspirin monotherapy  | 938.3±1404.7      | 486.3±312.6      | 305.0±151.2      | 0.787 |
| Combination therapy  | 945.0±1530.5      | 482.5±261.5      | 381.7±142.3      | 0.537 |
| LS mean difference   | -6.7              | 3.8              | -76.7            |       |
| 95% CI of difference | -218.2 to 204.8   | -165.9 to 173.4  | -205.8 to 52.5   |       |
| p value              | 0.530             | 0.889            | 0.115            |       |
| hs-CRP ( $\mu$ g/dL) |                   |                  |                  |       |
| Aspirin monotherapy  | 119.2±138.6       | 82.5±47.7        | 173.3±145.7      | 0.814 |
| Combination therapy  | 121.7±132.2       | 78.8±66.6        | 110.0±61.6       | 0.585 |
| LS mean difference   | 33.5              | 3.8              | 63.3             |       |
| 95% CI of difference | -2.5 to 186.8     | -58.0 to 65.5    | -59.4 to 186.0   |       |
| p value              | 0.767             | 0.865            | 0.292            |       |

Values are presented as mean±standard deviation or number. CLPD: clopidogrel, CILO: cilostazol, PUFA: omega-3 polyunsaturated fatty acid, vWF:Ag: von Willebrand factor antigen, LS: least squares, CI: confidence interval, hs-CRP: high sensitivity C-reactive protein
