# Supplementary material for: Antiplatelet Therapy Combinations and Thrombogenicity in Patients with Non-Valvular Atrial Fibrillation
Source: PubMed Central journal article supplement — Korean Circ J. 2017 May 25;47(3):366–76. doi: 10.4070/kcj.2016.0384 (PMC5449531; doi:10.4070/kcj.2016.0384), 2017-05-25
Supplement: kcj-47-366-s002.pdf [file kcj-47-366-s002.pdf]

**Supplementary Table 2.** Correlation between the changes in thrombogenic markers and platelet reactivity in patients of CHA<sub>2</sub>DS<sub>2</sub>-VASc score ≥2

| Platelet reactivity          | vWF:Ag (IU/dL)      | Fibrinogen (mg/dL)   | D-dimer (ng/mL)      | Hs-CRP (μg/dL)      |
|------------------------------|---------------------|----------------------|----------------------|---------------------|
| ADP (10 μM)                  | r=0.155<br>p=0.449  | r=0.396*<br>p=0.045* | r=0.102<br>p=0.618   | r=-0.114<br>p=0.579 |
| TRAP (25 μM)                 | r=-0.010<br>p=0.960 | r=0.124<br>p=0.545   | r=0.085<br>p=0.678   | r=-0.138<br>p=0.503 |
| Collagen (6 μg/dL)           | r=0.309<br>p=0.125  | r=0.110<br>p=0.592   | r=0.404*<br>p=0.041* | r=0.076<br>p=0.711  |
| Arachidonic acid (0.5 mg/dL) | r=0.179<br>p=0.381  | r=-0.084<br>p=0.683  | r=0.238<br>p=0.243   | r=-0.002<br>p=0.993 |

\*Values showed a statistical significance. vWF:Ag: von Willebrand factor antigen, Hs-CRP: high sensitivity C-reactive protein, ADP: adenosine diphosphate, TRAP: thrombin receptor agonist peptide
